# Supplementary material
Source: PubMed Central journal article supplement (PMC2681790)

Position of CodY boxes (AATTTTCWGAAATT) related to start codons in 3 different *S. aureus* genomes

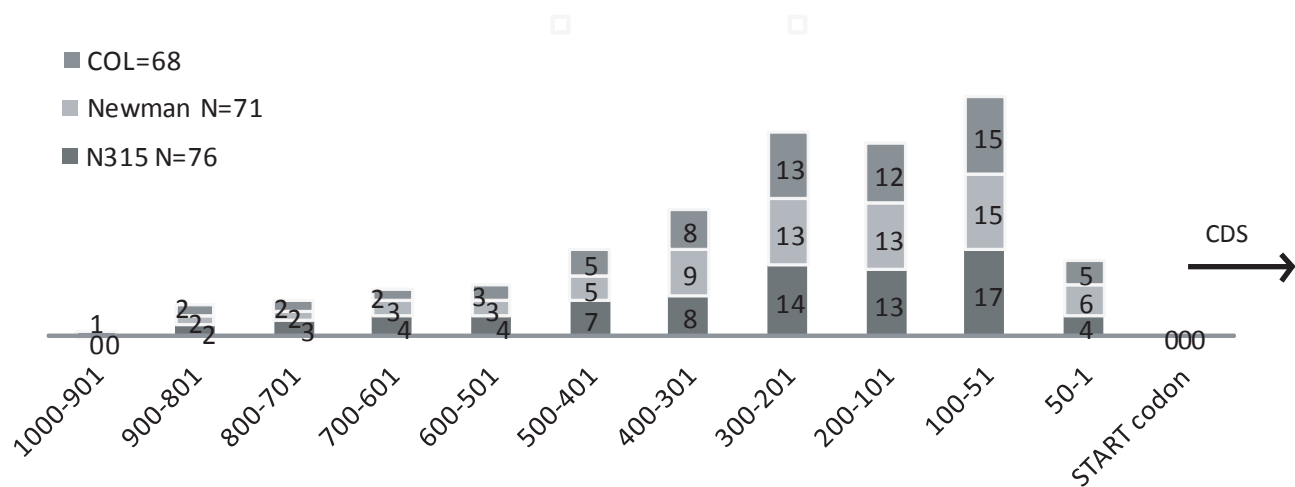

Supplement: supp_191_9_2953__1.pdf [file supp_191_9_2953__1.pdf]
